# Supplementary material
Source: publisher site journal article supplement (https://www.dovepress.com/article/533091)
Supplement: Supplementary file 1 [file 533091%20Revised%20Supplemental%20Table%201.docx]

**Supplemental Table 1A: Spectacle independence: Patients requiring eyeglasses to see at any distance and at distance, intermediate, and near in general lighting within the last 7 days at 3 months postoperatively (n=50)**

|  | Never (%) | Rarely (%) | Sometimes (%) | Most of the time (%) | All the time (%) |
| --- | --- | --- | --- | --- | --- |
| At any Distance | 84 | 4 | 8 | 4 | 0 |
| Far Away | 98 | 2 | 0 | 0 | 0 |
| At Arm’s Length | 94 | 2 | 2 | 2 | 0 |
| Up Close | 86 | 4 | 4 | 2 | 4 |

**Supplemental Table 1B: Patient-reported quality of vision in photopic lighting at distance, intermediate, and near following cataract surgery at 3 months postoperatively (n=50)**

|  | Very Good (%) | Good (%) | Neither Good Nor Bad (%) | Bad (%) | Very Bad (%) |
| --- | --- | --- | --- | --- | --- |
| Distance | 38 | 54 | 4 | 2 | 2 |
| Intermediate | 46 | 46 | 4 | 2 | 2 |
| Near | 38 | 44 | 10 | 6 | 2 |

**Supplemental Table 1C: Patient-reported quality of vision in dim lighting at distance, intermediate, and near following cataract surgery at 3 months postoperatively (n=50)**

|  | Very Good (%) | Good (%) | Neither Good Nor Bad (%) | Bad (%) | Very Bad (%) |
| --- | --- | --- | --- | --- | --- |
| Distance | 34 | 56 | 6 | 2 | 2 |
| Intermediate | 40 | 48 | 8 | 2 | 2 |
| Near | 28 | 46 | 18 | 6 | 2 |
